# Supplementary material for: Microbelt–void–microbelt-structured SnO2@C as an advanced electrode with outstanding rate capability and high reversibility
Source: Royal Society of Chemistry journal article supplement (doi:10.1039/c9ta00527g), 2019-01-01
Supplement: c9ta00527g1.pdf [file c9ta00527g1.pdf]

Supporting Information for

## Microbelt-void-Microbelt Structured $\text{SnO}_2/\text{C}$ as Advanced Electrode with Outstanding Rate Capability and High Reversibility

Wenhe Xie,<sup>a,b</sup> Qishang Wang,<sup>a,b</sup> Junqi Xu<sup>\*a,b</sup>, Yang Yu,<sup>a,b</sup> Ru Zhao,<sup>a,b</sup> Na Li,<sup>a,b</sup> Menghui Li,<sup>a,b</sup> Yifan Du,<sup>a,b</sup> Shanglong Peng<sup>\*c</sup> and Guozhong Cao<sup>\*d</sup>

<sup>a</sup> Key Laboratory of Microelectronics and Energy of Henan Province, Xinyang Normal University, Xinyang 464000, PR China. E-mail: phxujunqi@126.com,

<sup>b</sup> Energy-Saving Building Materials Innovative Collaboration Center of Henan Province, Xinyang Normal University, Xinyang 464000, PR China

<sup>c</sup> School of Physical Science and Technology, Lanzhou University, Lanzhou 730000, PR. China. E-mail: pengshl@lzu.edu.cn

<sup>d</sup> Department of Materials Science and Engineering, University of Washington, Seattle, USA. E-mail: gzcao@u.washington.edu

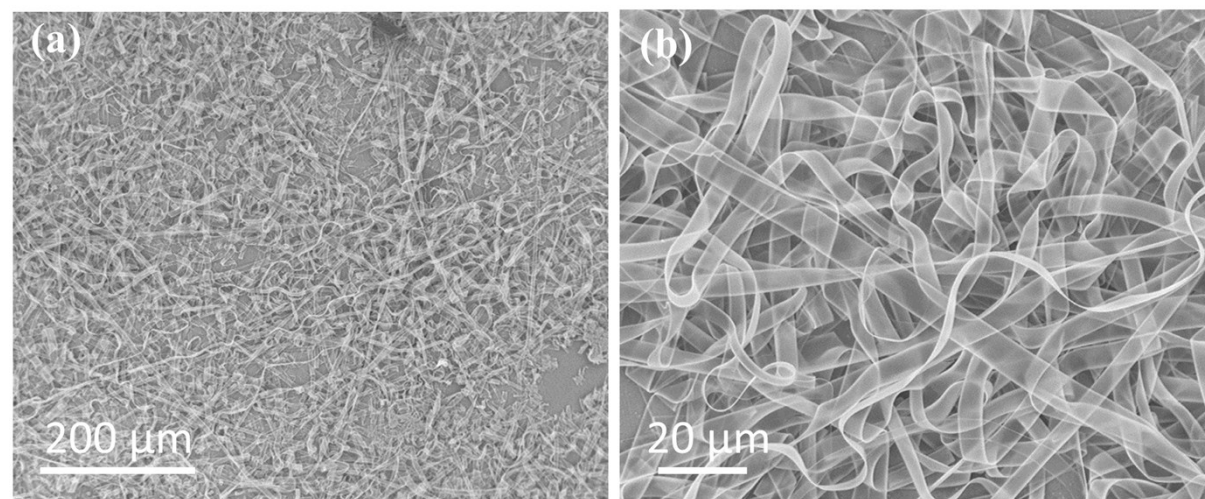

Figure S1. (a, b) SEM images of electrospinning products without annealing treatment.

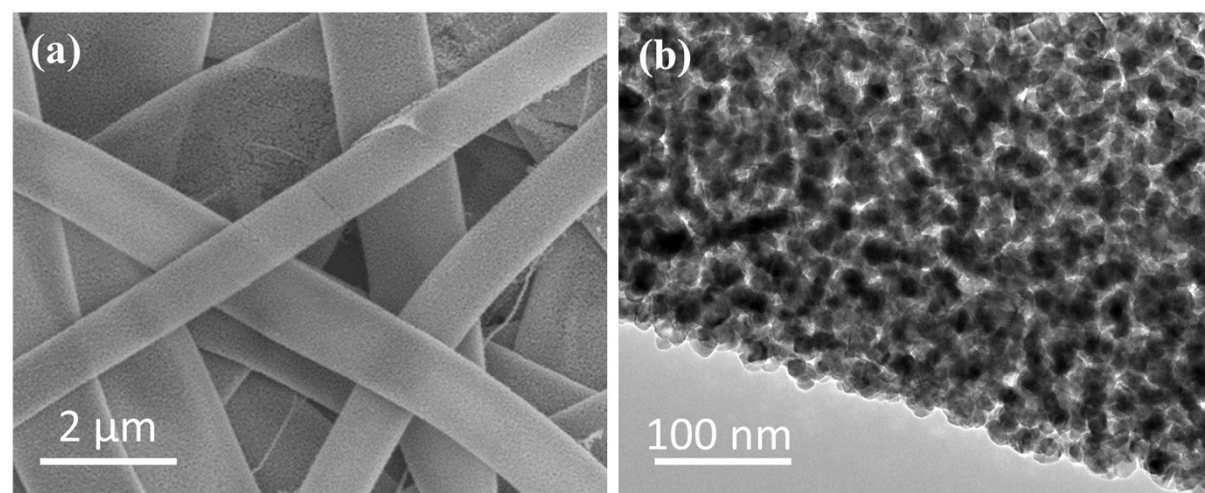

Figure S2. Morphological characterization of  $\text{SnO}_2$  microbelts. (a-b) SEM images, (c-d) TEM of  $\text{SnO}_2$  microbelts.

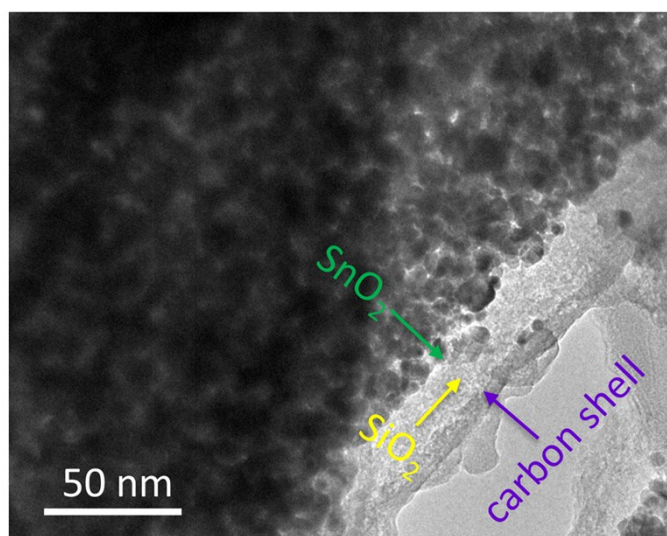

Figure S3. TEM images of the SnO<sub>2</sub> microbelt coated with SiO<sub>2</sub> and carbonized polydopamine.

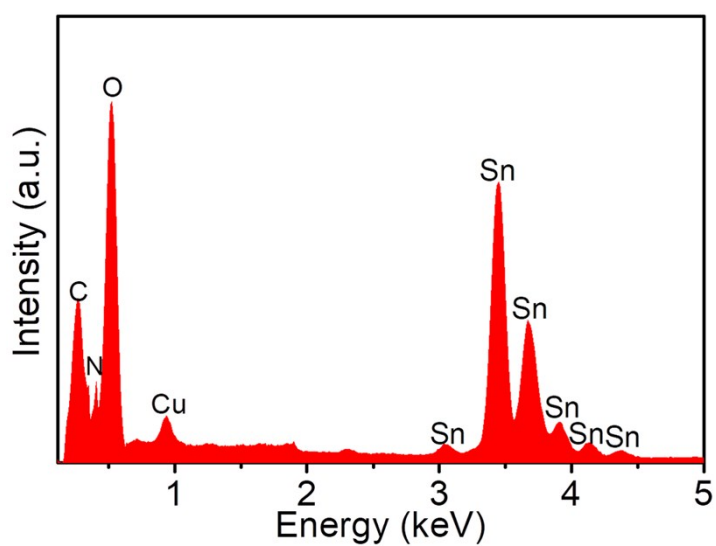

Figure S4. EDX spectrum of microbelt-void-microbelt structured SnO<sub>2</sub>@C, showing the mass ratio of Sn, O, C and N are 54.47, 27.72, 15.29 and 2.51wt%, respectively.

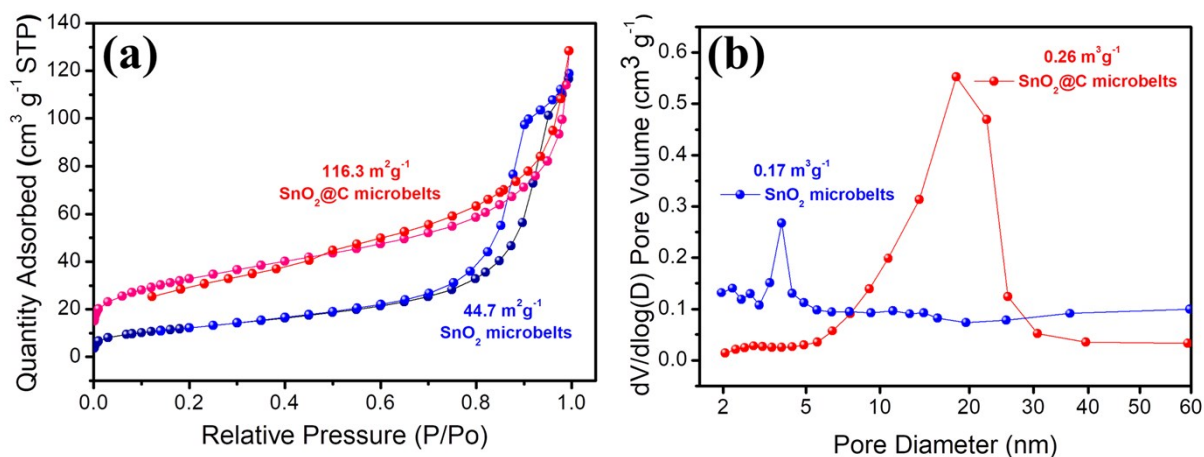

Figure S5. (a) Nitrogen adsorption-desorption isotherms of the SnO<sub>2</sub> microbelt and microbelt-void-microbelt structured SnO<sub>2</sub>@C sample. (b) The corresponding pore size distribution.

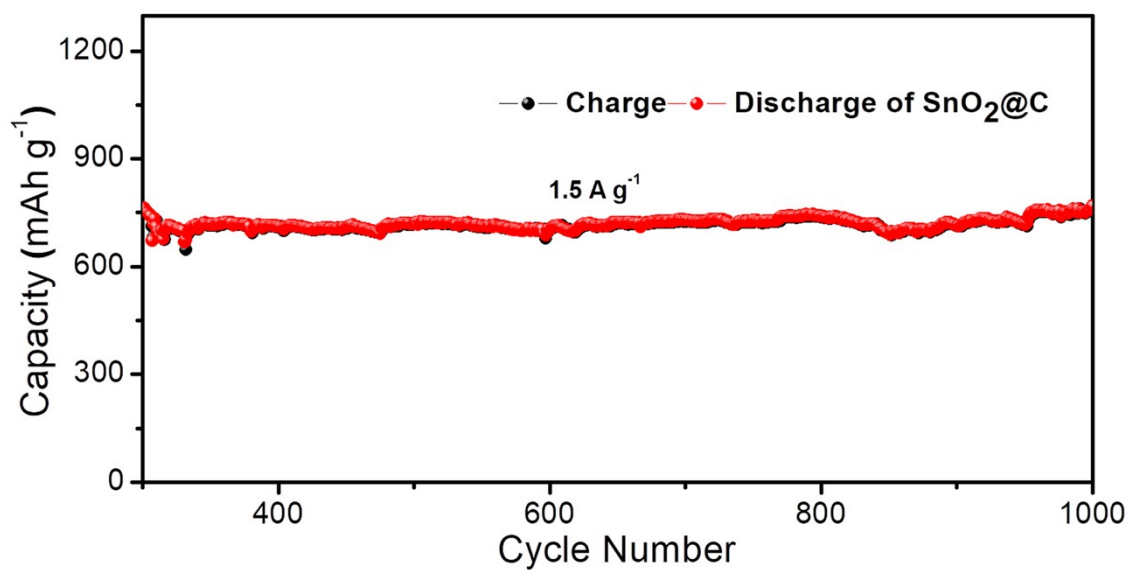

Figure S6. Cyclic performance of microbelt-void-microbelt structured SnO<sub>2</sub>@C at 1.5 A g<sup>-1</sup> after 300 cycles at 0.3 A g<sup>-1</sup>.

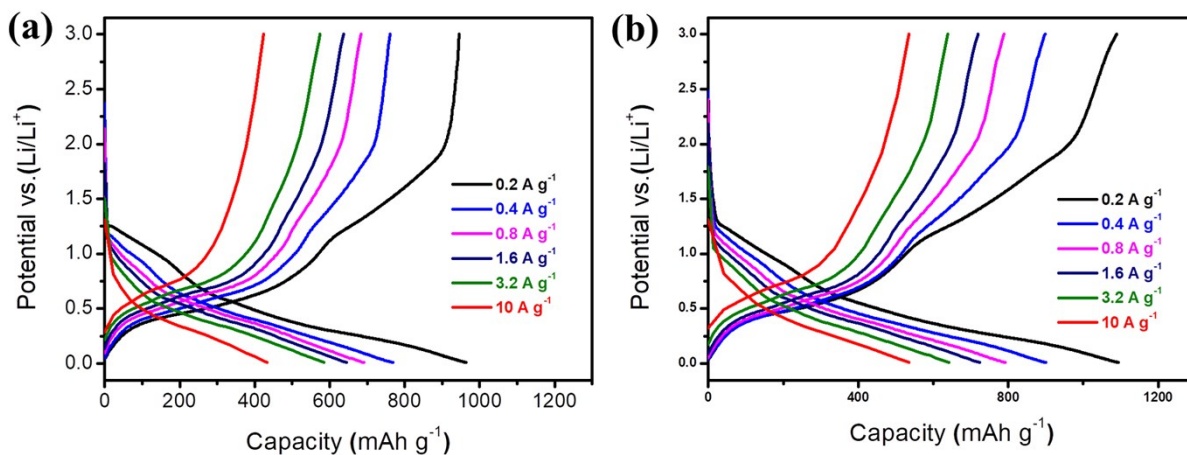

Figure S7. Charge and discharge profiles of (a)  $\text{SnO}_2$  and (b) microbelt-void-microbelt structured  $\text{SnO}_2@C$  electrode at various current densities.

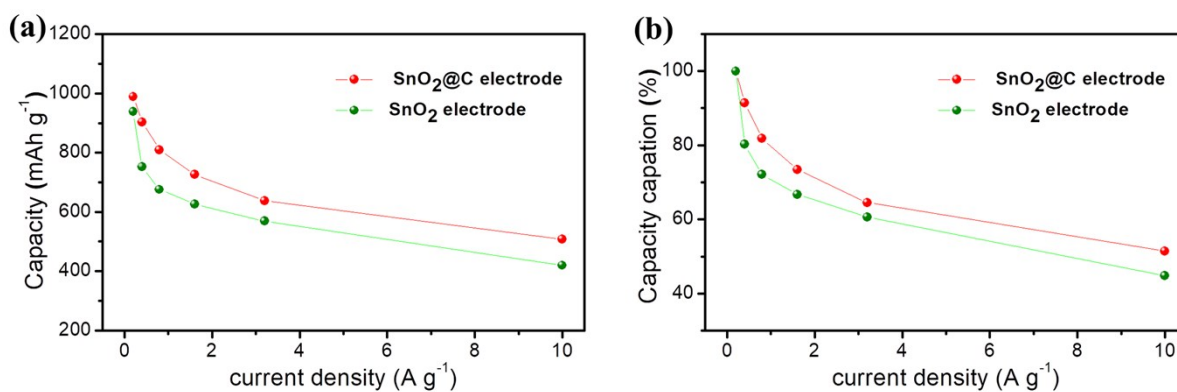

Figure S8. (a) Capacity and (b) capacity retention rate vs. current density plot of the two microbelt electrodes.

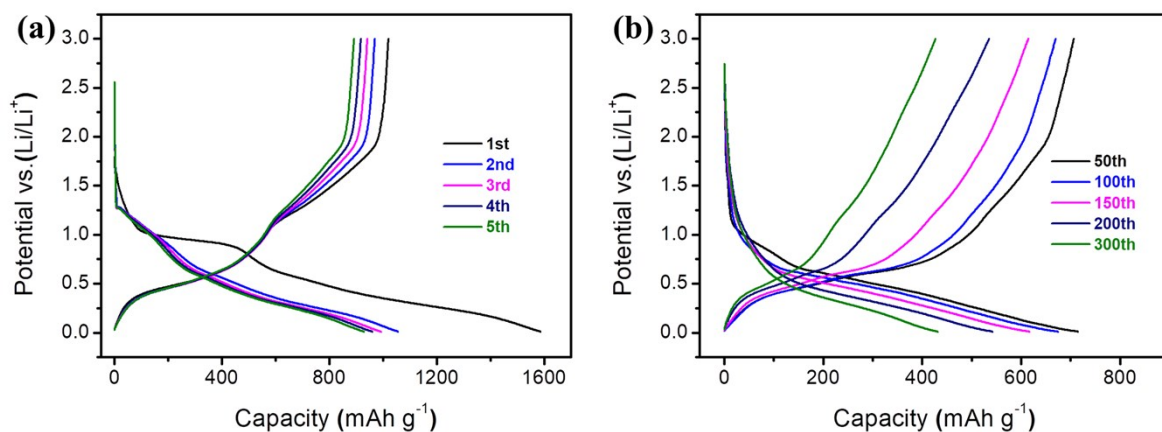

Figure S9. (a) Galvanostatic discharge-charge profiles of the SnO<sub>2</sub> microbelt electrode in the initial 5 cycles. (b) Galvanostatic discharge-charge profiles of the SnO<sub>2</sub> microbelt electrode in the 50th, 100th, 200th, 250th, and 300th cycles.

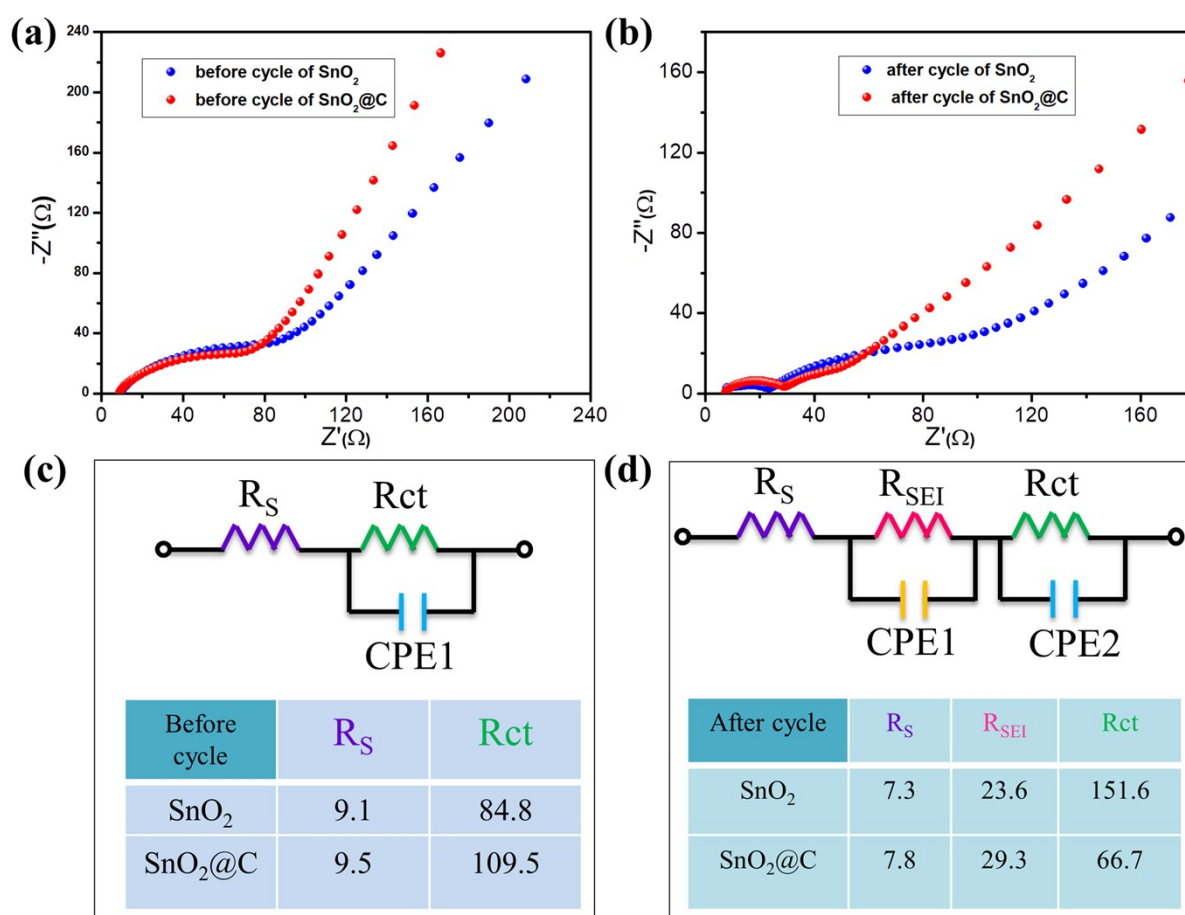

Figure S10. Electrochemical impedance spectroscopy of SnO<sub>2</sub> and SnO<sub>2</sub>@C electrode: (a) Before cycle, (b) after cycle, (c,d) the corresponding equivalent circuit and calculated resistances.
